# Supplementary material for: OsARD4 encoding an acireductone dioxygenase improves root architecture in rice by promoting development of secondary roots
Source: PubMed Central journal article supplement (PMC6200752; doi:10.1038/s41598-018-34053-y), 2018-10-24
Supplement: 41598_2018_34053_MOESM1_ESM.pdf [file 41598_2018_34053_MOESM1_ESM.pdf]

## **Supplementary Information**

### ***OsARD4* encoding an *acireductone dioxygenase* improves root architecture in rice by promoting development of secondary roots**

Valarmathi Ramanathan\*\*, Hifzur Rahman\*\*, Saravanan Subramanian, Jagadeeshselvam  
Nallathambi, Ashokkumar Kaliyaperumal, Sudha Manickam, Chandrababu Ranganathan and  
Raveendran Muthurajan\*

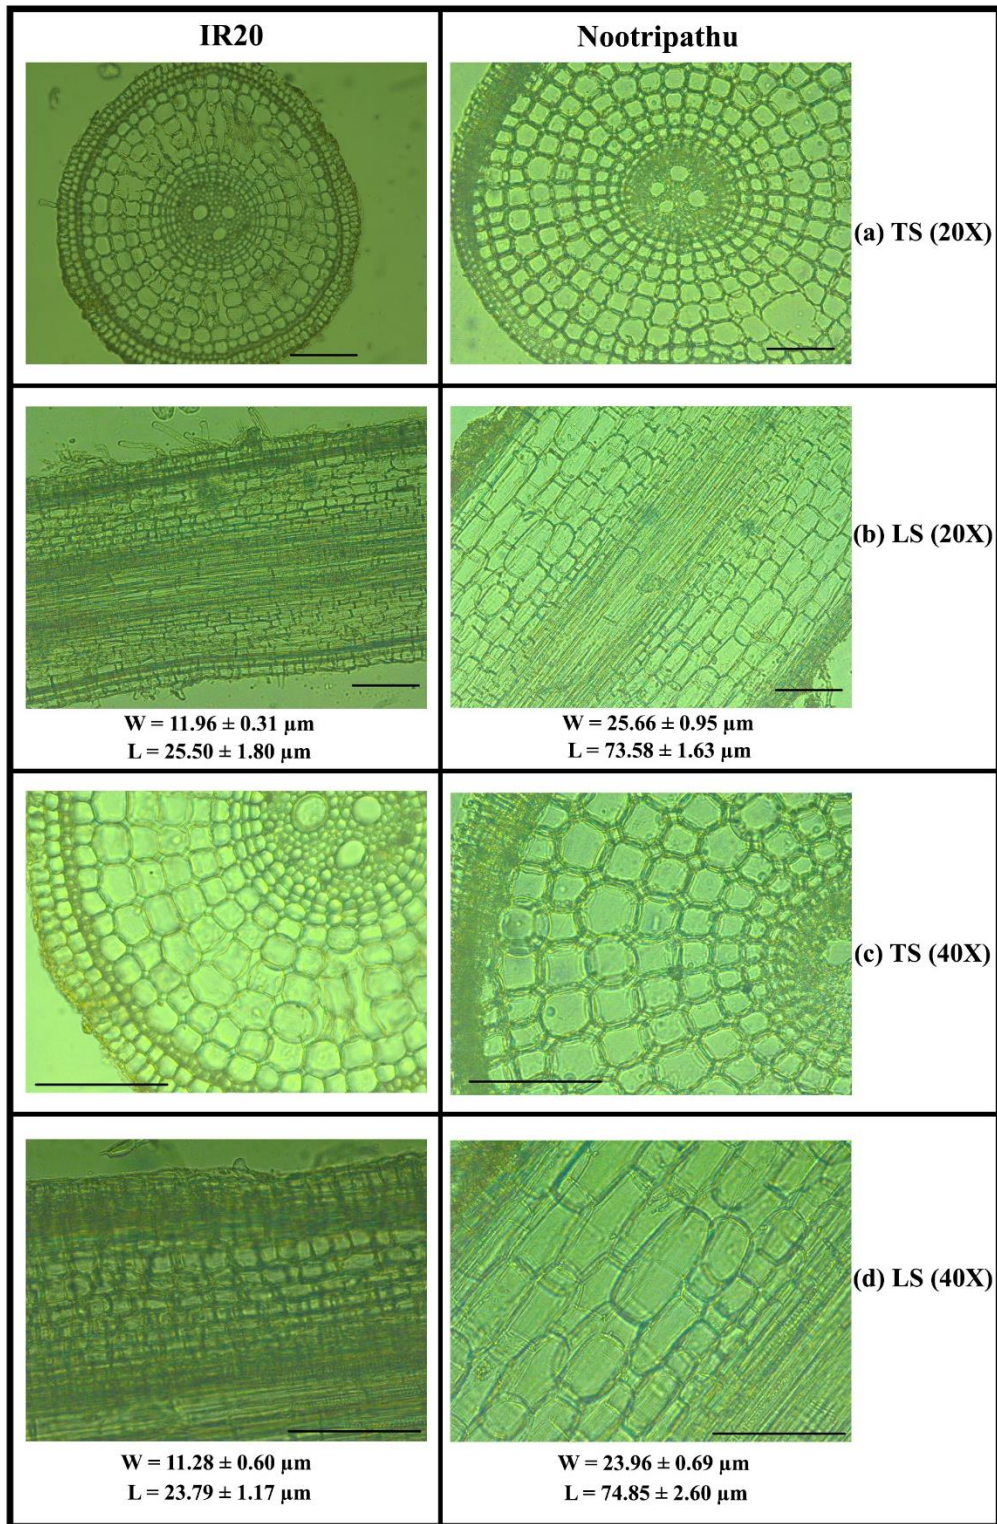

**Supplementary Fig. 1.** Micrograph of primary roots (4-5 cm from the tip) in 35 days old plants of IR20 and Nootripathu grown under greenhouse conditions; Where W, cell width; L, cell length; TS, transverse section and LS, longitudinal section. Length and width of cells were measured using stage micrometer.

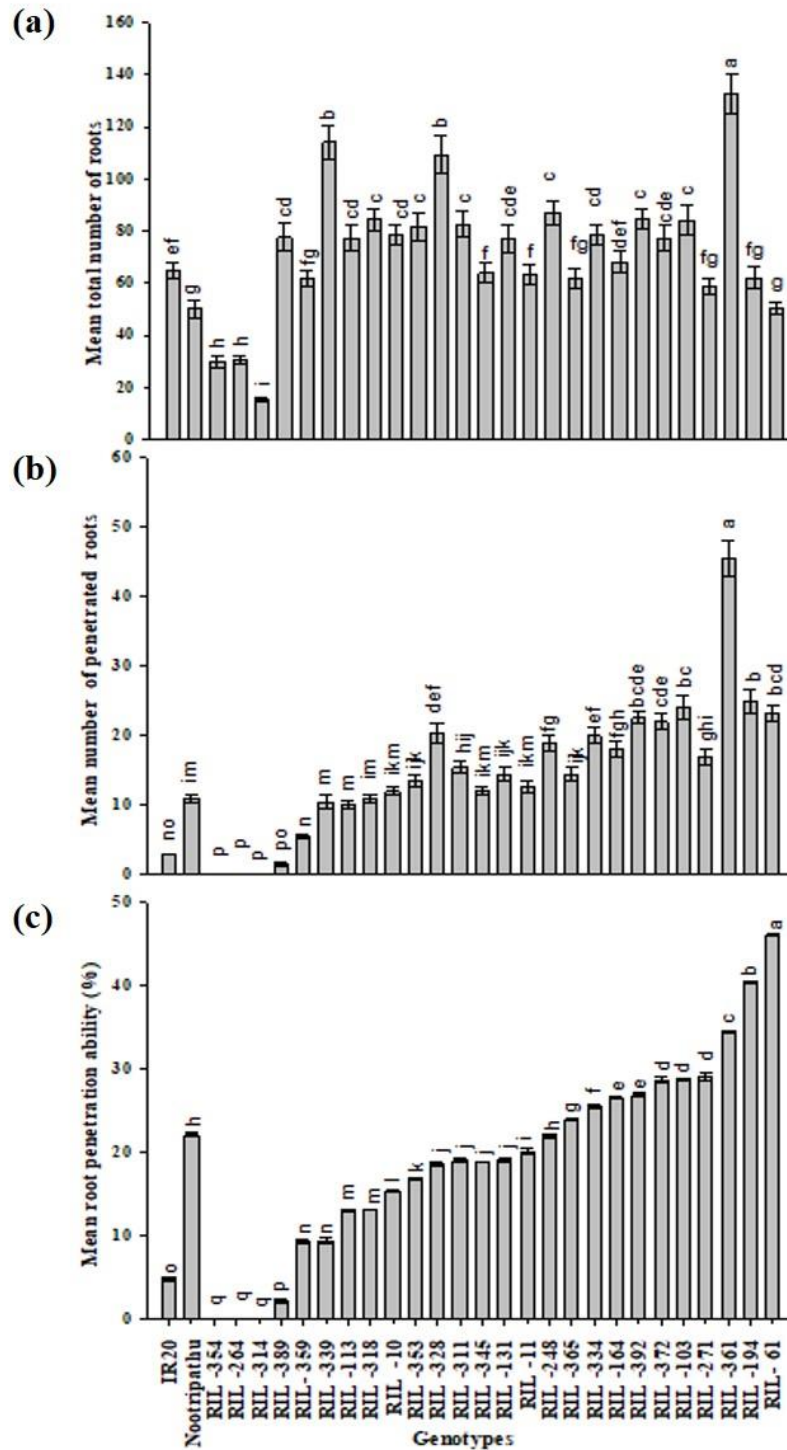

**Supplementary Fig. 2.** (a) Total number of roots, (b) number of penetrated roots and (c) root penetration ability (%) of IR20, Nootripathu and their RILs. Data represents the mean of three replications; Vertical bars represent standard error. One-way ANOVA was performed and mean was compared using Fisher's Least Significant Difference (LSD). Genotypes with same alphabets are on-par with each other and different letter alphabets are significantly different ( $p < 0.01$ ).

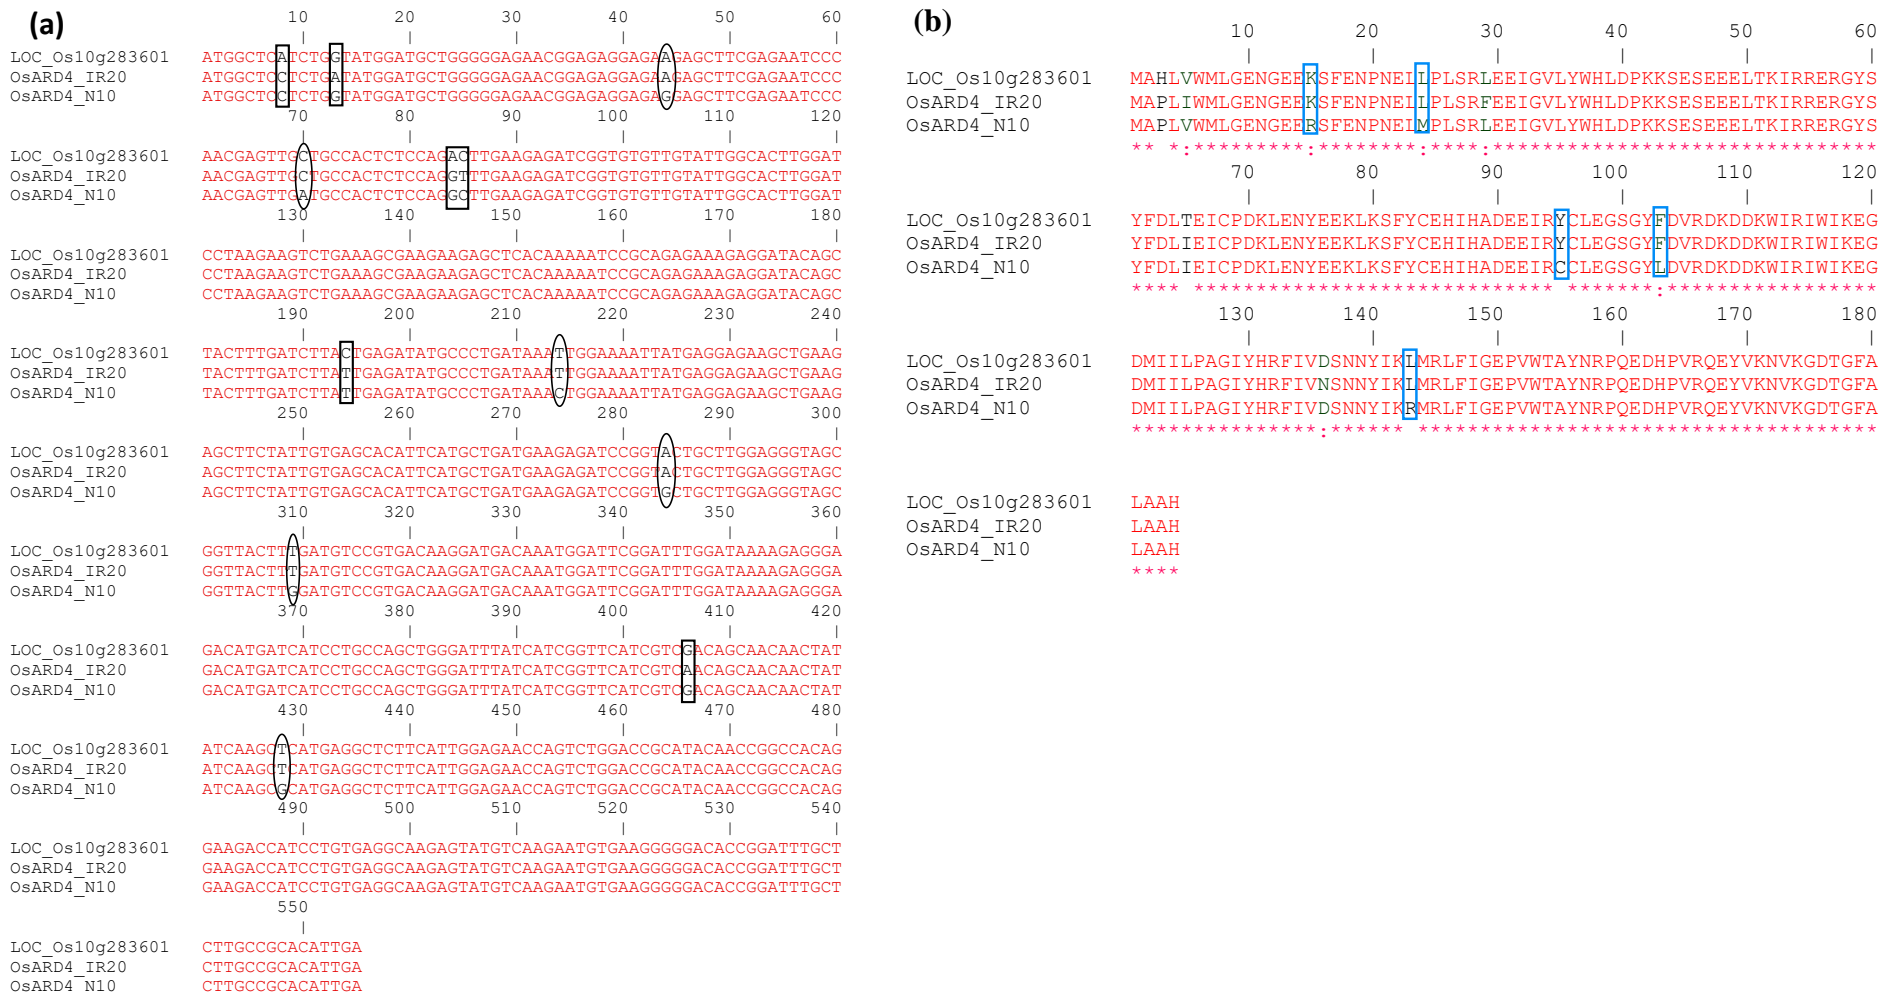

**Supplementary Fig. 3.** Multiple sequence alignment of nucleotide **(a)** and amino acid **(b)** sequences of *OsARD4* from IR20 (*OsARD4\_IR20*); Nootripathu (*OsARD4\_N10*) and Nipponbare (LOC\_Os10g283601). Circle shows the sequence variation(s) specific to Nootripathu and other variations are shown in rectangular boxes. Amino acid variations specific to Nootripathu are indicated by blue rectangular boxes.



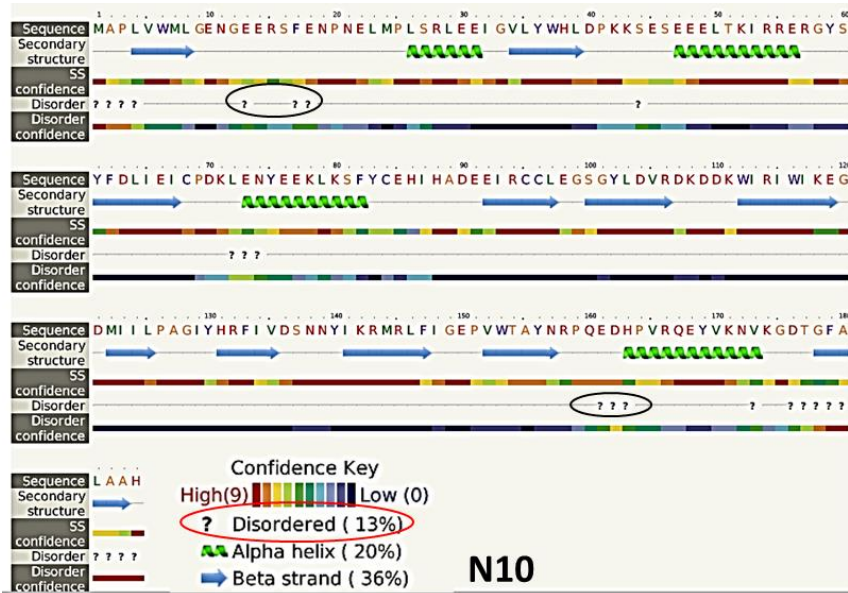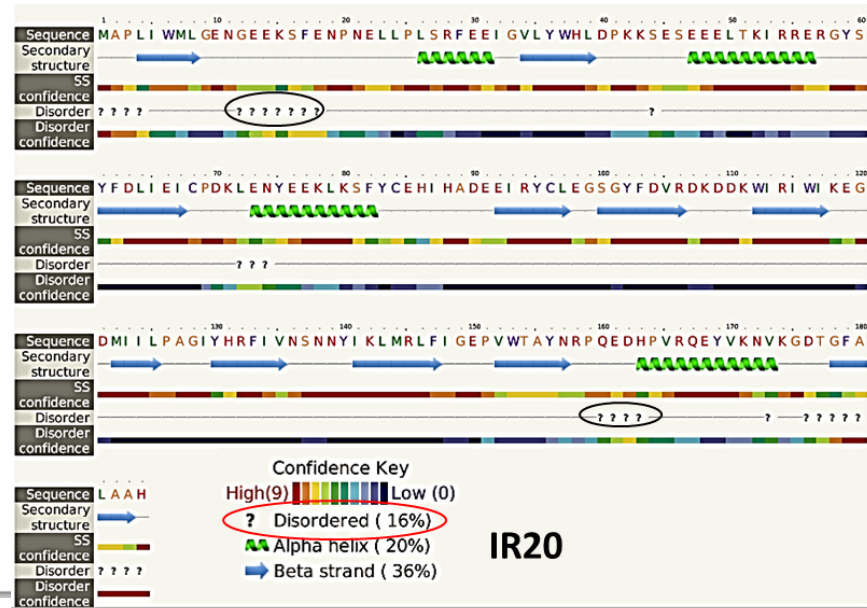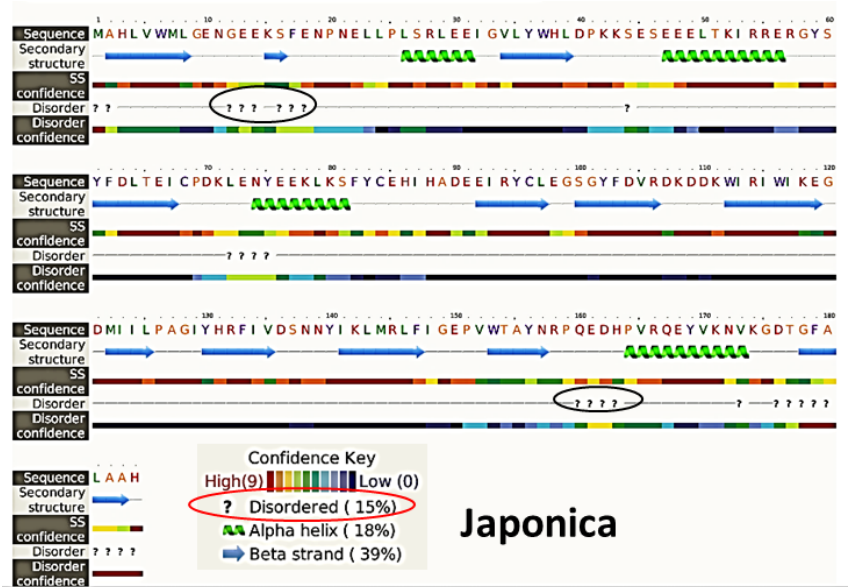

**Supplementary Fig. 4.** Prediction of secondary structure and disorder among three different alleles of *OsARD4* using ExPASy (Protein Homology/analogue Recognition Engine V 2.0) Phyre 2 software (<http://www.sbg.bio.ic.ac.uk/phyre2>). Predicted disorders are indicated in red and black circles.

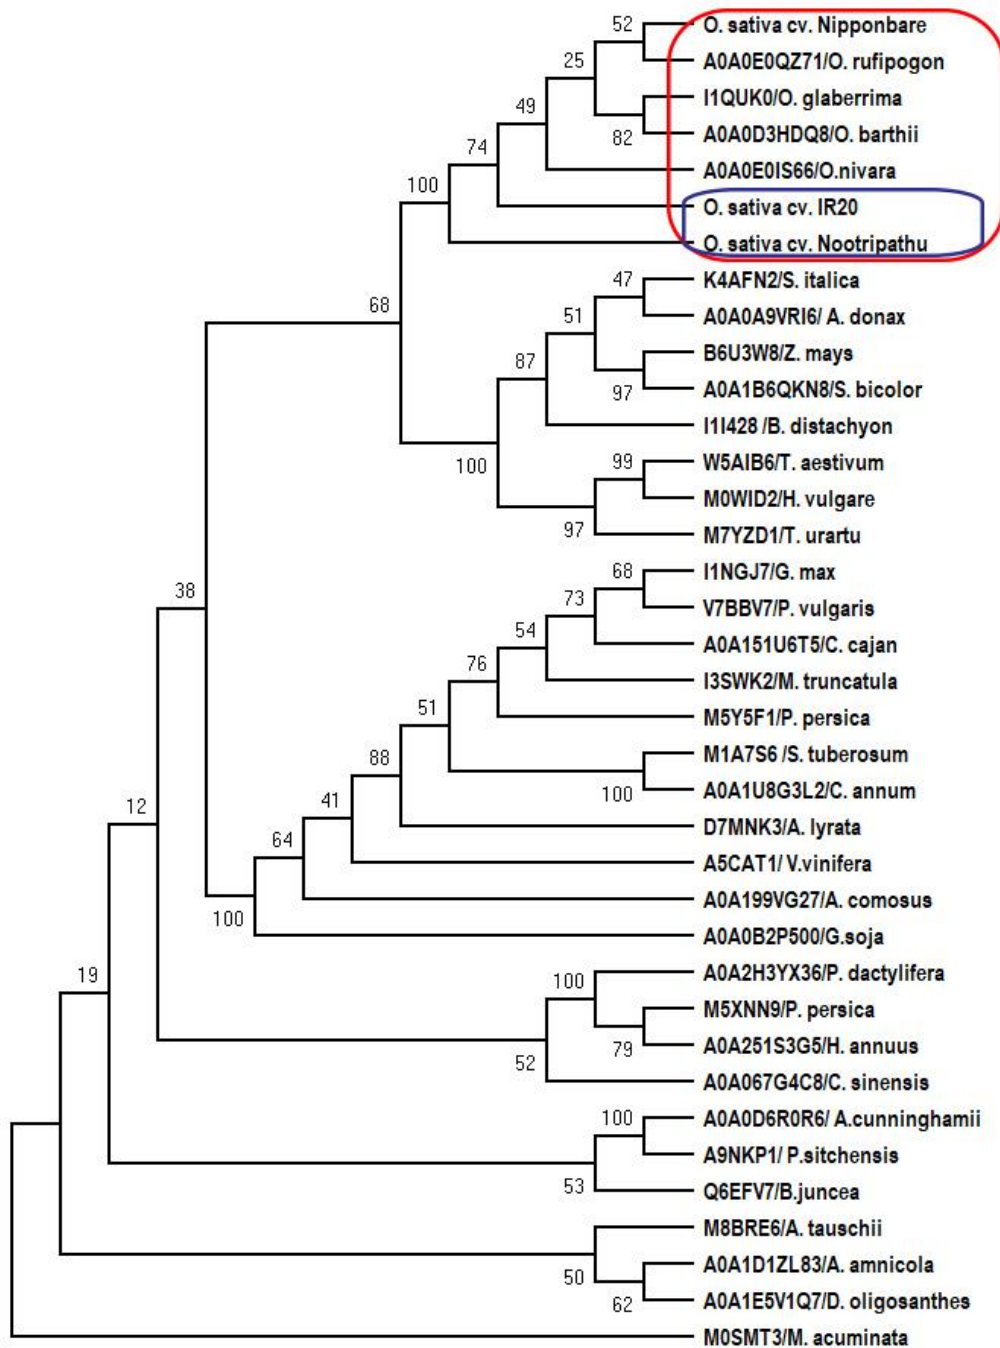

**Supplementary Fig. 5.** Phylogenetic analysis of *ARD4* sequences from IR20, Nootripathu and Nipponbare along with homologs of other plant species including few members of genus *Oryza* using MEGA 7.0 software. Phylogenetic analysis was carried out using the UPGMA method. The evolutionary distances were computed using the Poisson correction method.

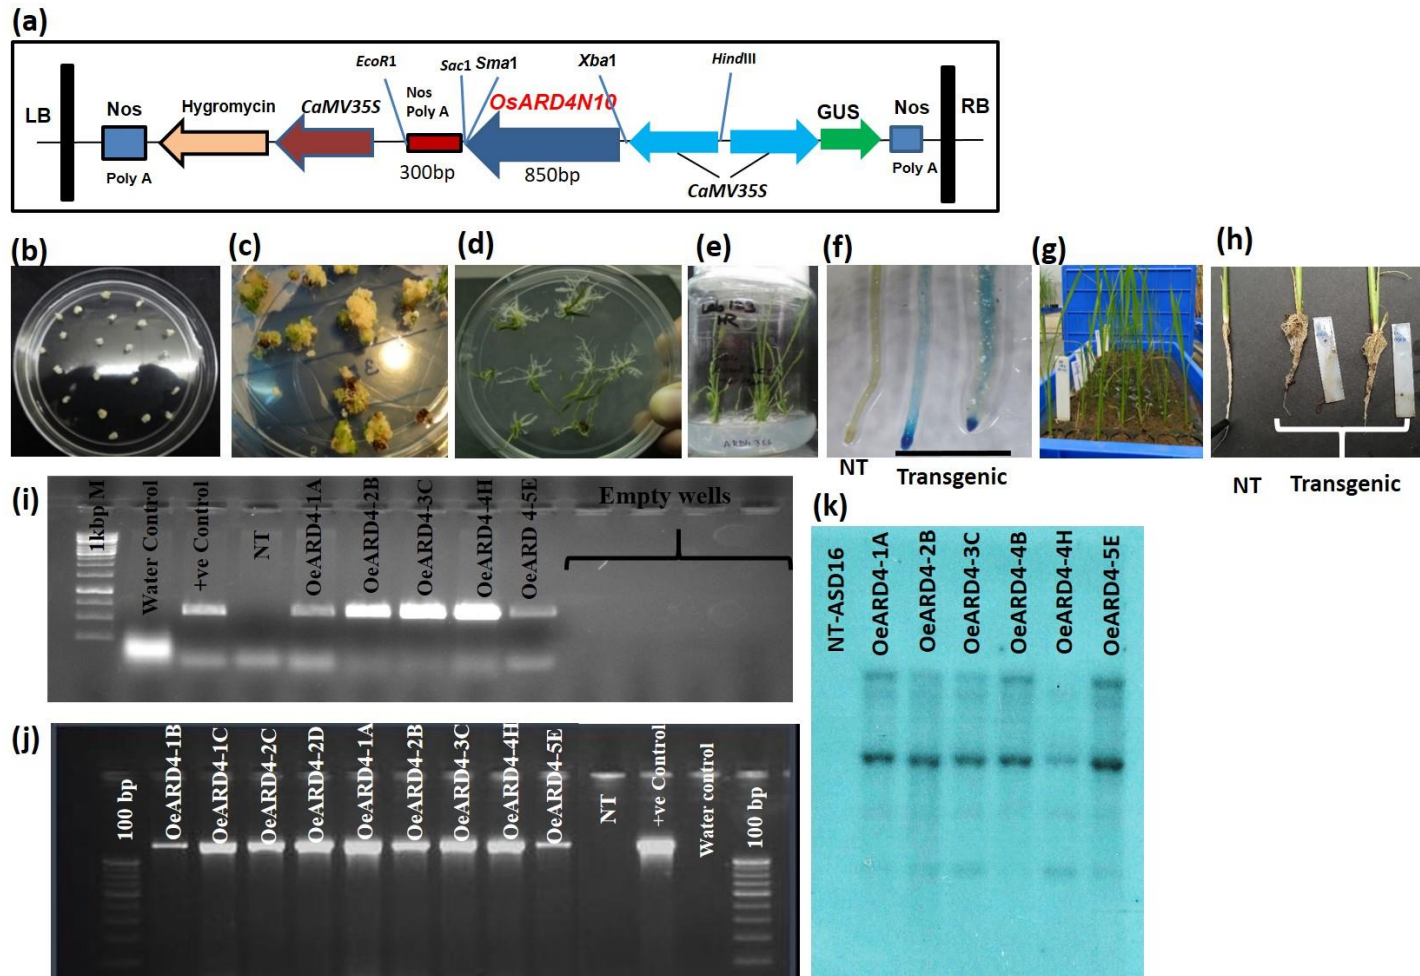

**Supplementary Fig. 6** Agrobacterium mediated transformation of rice genotype ASD16 using pCAMBIA 1301 harbouring *OsARD4*<sub>Nootripathu</sub>. (a) pCAMBIA 1301 harboring *OsARD4*<sub>Nootripathu</sub> driven by *CaMV35S* promoter; (b-e) steps involved in development of transgenic ASD16 plants engineered with *OsARD4*; (f) Histochemical GUS staining in roots of NT-ASD16 and transgenic lines in T<sub>0</sub> generation; (g) hardening of T<sub>0</sub> plants in portrays under greenhouse conditions; (h) Roots of NT-ASD16 and transgenic lines before transplanting to pots; (i-j) PCR screening of putative transformants using primers specific to GUS gene (i) and *CaMV35S* promoter (forward primer) and hygromycin marker (reverse primer) (j); (k) Southern bolt analysis in *OsARD4* transgenic events.



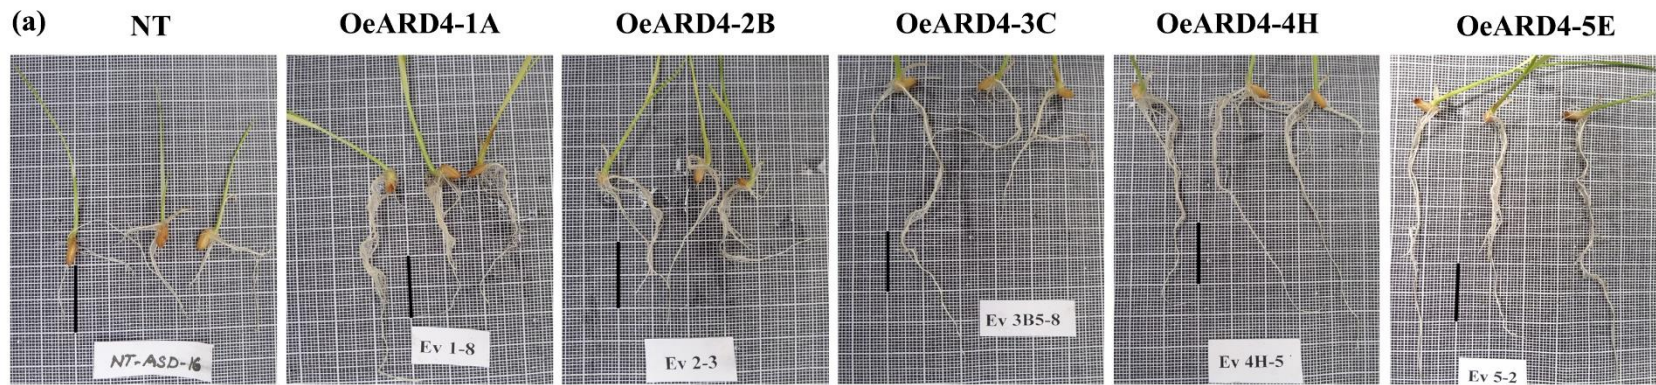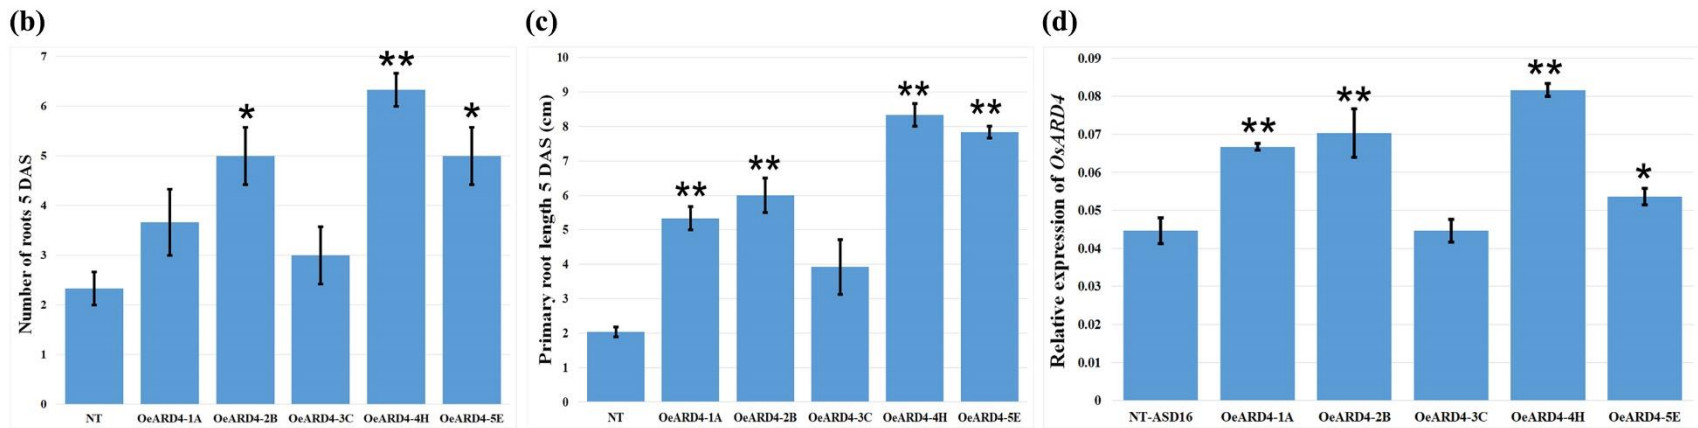

**Supplementary Fig. 7. Evaluation of transgenic ASD16 (T<sub>1</sub>) for root characteristics and over-expression of *OeARD4*.** (a) Root growth pattern in 5 days old seedlings (grown in petri plates) of non-transgenic ASD16 and putative transgenic ASD16 lines (Scale bar = 2 cm); (b) Number of roots in 5 days old seedlings of non-transgenic and transgenic ASD16 plants; (c) Length of primary roots in 5 days old seedlings of non-transgenic and transgenic ASD16 plants; (d) qRT-PCR analysis of *OeARD4* transcripts in root tissues of non-transgenic and transgenic ASD16 plants. Each data is a mean of three replications. \*indicates statistical significance at P < 0.05 and \*\*indicates statistical significance at P < 0.01.



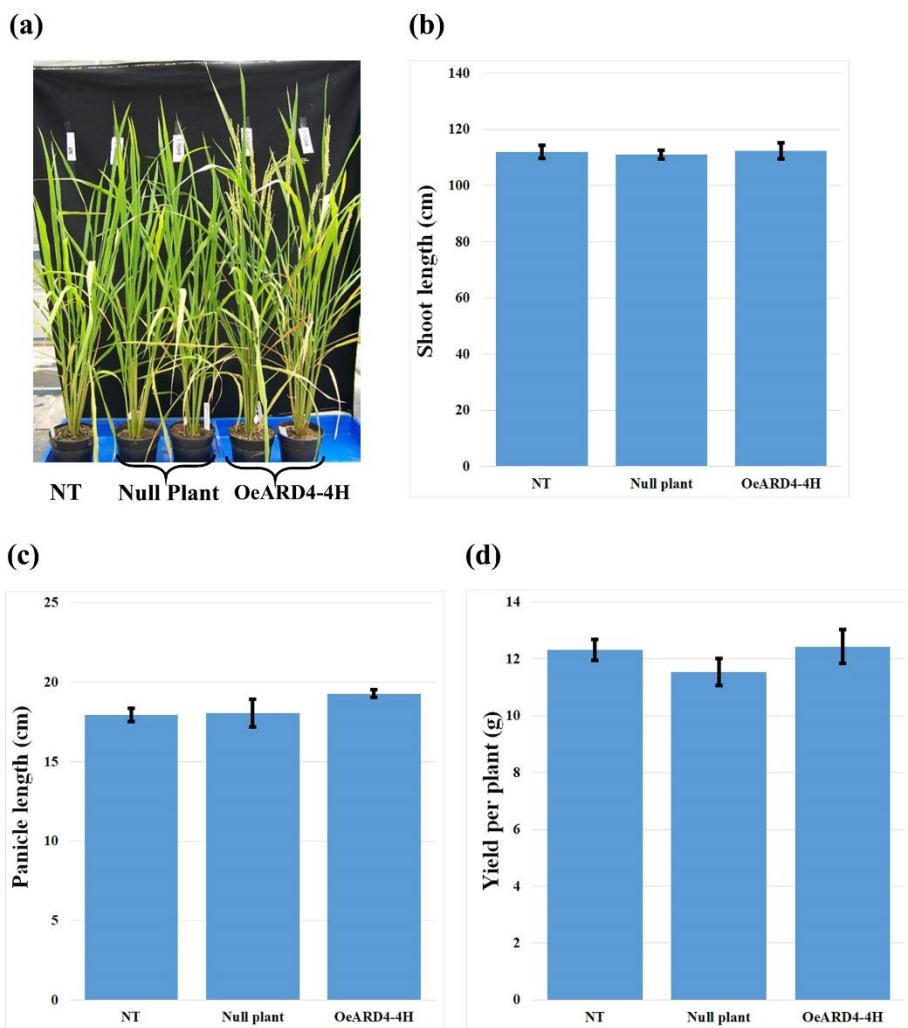

**Supplementary Fig. 8.** Shoot growth characteristics of OeARD4-4H in comparison with null-plants and non-transgenic ASD16 at maturity stage. (a) General appearance of transgenic ASD16 plants (OeARD4-4H) in comparison with null/non-transgenic plants of ASD16; (b) Shoot length at maturity, (c) panicle length and (d) single plant yield of OeADR4-4H in comparison null(s) and non-transgenic ASD16 plants. Each value is a mean of three replications.

**Supplementary Table S1. Observations on anatomical characters in root tips of IR 20 and Nootripathu**

| <b>Genotypes</b> | <b>Number of cells in divisional zone (100µm scale)</b> | <b>Number of cells in elongation zone (100µm scale)</b> | <b>Length of cells in elongation zone (µm)</b> | <b>Width of cells in elongation zone (µm)</b> | <b>Root cap length (µm)</b> | <b>Number of cells per root cap</b> | <b>Root thickness (µm)</b> |
|------------------|---------------------------------------------------------|---------------------------------------------------------|------------------------------------------------|-----------------------------------------------|-----------------------------|-------------------------------------|----------------------------|
| IR20             | 385 <sup>b</sup>                                        | 188.75 <sup>b</sup>                                     | 30.1 <sup>b</sup>                              | 20.2 <sup>b</sup>                             | 215.0 <sup>a</sup>          | 173.7 <sup>b</sup>                  | 265 <sup>b</sup>           |
| Nootripathu      | 502.5 <sup>a</sup>                                      | 207.5 <sup>a</sup>                                      | 38.0 <sup>a</sup>                              | 23.4 <sup>a</sup>                             | 177.5 <sup>b</sup>          | 291.3 <sup>a</sup>                  | 390 <sup>a</sup>           |

\*Measurements were made in roots of 5 days old seedlings; Each observation is an average of 6 independent measurements.

**Supplementary Table 2. Co-localization analysis of DE Proteins against QTLs for root growth related traits in rice**

| LOCs           | Spot ID | Protein Name                     | Trait name                  | Chromosome | Left locus | Start Position | Right locus | Stop Position | Reference               |
|----------------|---------|----------------------------------|-----------------------------|------------|------------|----------------|-------------|---------------|-------------------------|
| LOC_Os03g27450 | D1      | Putative ADP-ribosylation factor | Maximum root length         | 3          | A123616    | 15335608       | RZ474       | 25128864      | MacMillan et al (2006)  |
| LOC_Os03g27450 | D1      | Putative ADP-ribosylation factor | Root penetration index      | 3          | A123616    | 15335608       | RZ474       | 25128864      | Price et al (2000)      |
| LOC_Os03g27450 | D1      | Putative ADP-ribosylation factor | Root fresh weight           | 3          | RM60       | 105852         | C814B       | 17113562      | Li et al (2005)         |
| LOC_Os03g27450 | D1      | Putative ADP-ribosylation factor | Root fresh weight           | 3          | RM60       | 105852         | C814B       | 17113562      | Li et al (2005)         |
| LOC_Os03g27450 | D1      | Putative ADP-ribosylation factor | Lateral root length         | 3          | RG409A     | 3495798        | T17         | 24086309      | Zheng et al (2003)      |
| LOC_Os03g27450 | D1      | Putative ADP-ribosylation factor | Deep root weight            | 3          | PC20M11    | 5729669        | PC20M12     | 27128592      | Kamoshita et al (2002b) |
| LOC_Os03g27450 | D1      | Putative ADP-ribosylation factor | Deep root ratio             | 3          | PC20M11    | 5729669        | PC20M12     | 27128592      | Kamoshita et al (2002b) |
| LOC_Os03g27450 | D1      | Putative ADP-ribosylation factor | Penetrated root number      | 3          | PC73M13    | 5729669        | PC3M5       | 27128592      | Ali et al (2000)        |
| LOC_Os03g27450 | D1      | Putative ADP-ribosylation factor | Penetrated root number      | 3          | PC73M13    | 5729669        | PC3M5       | 27128592      | Ali et al (2000)        |
| LOC_Os03g27450 | D1      | Putative ADP-ribosylation factor | Root penetration index      | 3          | PC73M13    | 5729669        | PC3M5       | 27128592      | Ali et al (2000)        |
| LOC_Os03g27450 | D1      | Putative ADP-ribosylation factor | Root penetration index      | 3          | PC73M13    | 5729669        | PC3M5       | 27128592      | Ali et al (2000)        |
| LOC_Os03g27450 | D1      | Putative ADP-ribosylation factor | Root to shoot ratio         | 3          | RM231      | 2453085        | G51         | 28528927      | Li et al (2005)         |
| LOC_Os11g11730 | D2      | Cell wall adhesion               | Maximum root length         | 11         | R2918      | 2449321        | C794        | 3035893       | Xu et al (2004)         |
| LOC_Os11g11730 | D2      | Cell wall adhesion               | Deep root weight per tiller | 11         | C477       | 5460751        | EM17_10     | 6686558       | Kamoshita et al (2002a) |
| LOC_Os11g11730 | D2      | Cell wall adhesion               | Root growth rate in depth   | 11         | RM332      | 2840213        | RM167       | 4073313       | Yue et al (2006)        |
| LOC_Os11g11730 | D2      | Cell wall adhesion               | Root dry weight             | 11         | C794       | 3033385        | RG118       | 4414504       | Xu et al (2004)         |
| LOC_Os11g11730 | D2      | Cell wall adhesion               | Root dry weight             | 11         | C794       | 3033385        | RG118       | 4414504       | Xu et al (2004)         |
| LOC_Os11g11730 | D2      | Cell wall adhesion               | Deep root weight            | 11         | R642       | 2015713        | RZ141       | 4078514       | MacMillan et al (2006)  |
| LOC_Os11g11730 | D2      | Cell wall adhesion               | Maximum root length         | 11         | R642       | 2015713        | RZ141       | 4078514       | Price et al (1999)      |
| LOC_Os11g11730 | D2      | Cell wall adhesion               | Deep root ratio             | 11         | RM286      | 383711         | RM332       | 2840362       | Yue et al (2006)        |
| LOC_Os11g11730 | D2      | Cell wall adhesion               | Deep root ratio             | 11         | RM286      | 383711         | RM332       | 2840362       | Yue et al               |

|                |    |                         |                             |    |          |          |               |          |                         |
|----------------|----|-------------------------|-----------------------------|----|----------|----------|---------------|----------|-------------------------|
|                |    |                         |                             |    |          |          |               |          | (2006)                  |
| LOC_Os11g11730 | D2 | Cell wall adhesion      | Maximum root length         | 11 | RM286    | 383711   | RM332         | 2840362  | Yue et al (2006)        |
| LOC_Os11g11730 | D2 | Cell wall adhesion      | Root thickness              | 11 | OSR1     | 201993   | RM202         | 9001898  | Li et al (2005)         |
| LOC_Os01g54700 | D3 | Retrotransposon protein | Root dry weight             | 1  | RZ19     | 30870169 | RG690         | 32311314 | Yadav et al (1997)      |
| LOC_Os01g54700 | D3 | Retrotransposon protein | Root thickness              | 1  | RZ19     | 30870169 | RG690         | 32311314 | Yadav et al (1997)      |
| LOC_Os01g54700 | D3 | Retrotransposon protein | Deep root weight            | 1  | R2417    | 31427184 | RM212         | 33053654 | Kamoshita et al (2002a) |
| LOC_Os01g54700 | D3 | Retrotransposon protein | Deep root weight per tiller | 1  | R2417    | 31427184 | RM212         | 33053654 | Kamoshita et al (2002a) |
| LOC_Os01g54700 | D3 | Retrotransposon protein | Maximum root length         | 1  | R2417    | 31427184 | RM212         | 33053654 | Price et al (1999)      |
| LOC_Os01g54700 | D3 | Retrotransposon protein | Root thickness              | 1  | R2417    | 31427184 | RM212         | 33053654 | Price et al (2002c)     |
| LOC_Os01g54700 | D3 | Retrotransposon protein | Deep root ratio             | 1  | RG957    | 31227089 | C813          | 33958675 | Kamoshita et al (2002a) |
| LOC_Os01g54700 | D3 | Retrotransposon protein | Deep root ratio             | 1  | RG957    | 31227089 | C813          | 33958675 | Kamoshita et al (2002a) |
| LOC_Os01g54700 | D3 | Retrotransposon protein | Root thickness              | 1  | ME10_14  | 31367453 | CDO345        | 37887562 | Kamoshita et al (2002a) |
| LOC_Os01g54700 | D3 | Retrotransposon protein | Root fresh weight           | 1  | C955     | 7476866  | C813          | 33958675 | Li et al (2005)         |
| LOC_Os01g54700 | D3 | Retrotransposon protein | Root thickness              | 1  | C904     | 13902370 | C742          | 40919568 | Li et al (2005)         |
| LOC_Os06g47150 | D6 | Auxin response factor   | Root dry weight             | 6  | CDO544   | 26409713 | RG653         | 29028429 | Yadav et al (1997)      |
| LOC_Os06g47150 | D6 | Auxin response factor   | Maximum root length         | 6  | P0547F09 | 28370801 | OSJNBA0069C14 | 31082396 | MacMillan et al (2006)  |
| LOC_Os06g47150 | D6 | Auxin response factor   | Root thickness              | 6  | P0547F09 | 28370801 | OSJNBA0069C14 | 31082396 | MacMillan et al (2006)  |
| LOC_Os06g47150 | D6 | Auxin response factor   | Maximum root length         | 6  | P0547F09 | 28370801 | OSJNBA0069C14 | 31082396 | Price et al (2002c)     |
| LOC_Os06g47150 | D6 | Auxin response factor   | Root branching index        | 6  | RM454    | 23380386 | RM412         | 30328051 | Horii et al (2006)      |
| LOC_Os01g56790 | D7 | Expressed protein       | Deep root weight            | 1  | R2417    | 31427184 | RM212         | 33053654 | Kamoshita et al (2002a) |
| LOC_Os01g56790 | D7 | Expressed protein       | Deep root weight per tiller | 1  | R2417    | 31427184 | RM212         | 33053654 | Kamoshita et al (2002a) |
| LOC_Os01g56790 | D7 | Expressed protein       | Maximum root length         | 1  | R2417    | 31427184 | RM212         | 33053654 | Price et al (1999)      |



|                |     |                                                    |                                      |   |         |          |        |          |                         |
|----------------|-----|----------------------------------------------------|--------------------------------------|---|---------|----------|--------|----------|-------------------------|
| LOC_Os01g56790 | D7  | Expressed protein                                  | Root thickness                       | 1 | R2417   | 31427184 | RM212  | 33053654 | Price et al (2002c)     |
| LOC_Os01g56790 | D7  | Expressed protein                                  | Maximum root length                  | 1 | RG690   | 32310761 | RZ730  | 34940769 | Courtois et al (2003)   |
| LOC_Os01g56790 | D7  | Expressed protein                                  | Deep root weight per tiller          | 1 | RG690   | 32310761 | RZ730  | 34940769 | Courtois et al (2003)   |
| LOC_Os01g56790 | D7  | Expressed protein                                  | Deep root to shoot ratio             | 1 | RG690   | 32310761 | RZ730  | 34940769 | Yadav et al (1997)      |
| LOC_Os01g56790 | D7  | Expressed protein                                  | Deep root ratio                      | 1 | RG957   | 31227089 | C813   | 33958675 | Kamoshita et al (2002a) |
| LOC_Os01g56790 | D7  | Expressed protein                                  | Deep root ratio                      | 1 | RG957   | 31227089 | C813   | 33958675 | Kamoshita et al (2002a) |
| LOC_Os01g56790 | D7  | Expressed protein                                  | Root thickness                       | 1 | ME10_14 | 31367453 | CDO345 | 37887562 | Kamoshita et al (2002a) |
| LOC_Os01g56790 | D7  | Expressed protein                                  | Root fresh weight                    | 1 | C955    | 7476866  | C813   | 33958675 | Li et al (2005)         |
| LOC_Os01g56790 | D7  | Expressed protein                                  | Root thickness                       | 1 | C904    | 13902370 | C742   | 40919568 | Li et al (2005)         |
| LOC_Os02g03100 | D8  | Oxidoreductase, aldo/keto reductase family protein | Penetrated root length               | 2 | PC33M9  | 744663   | PC79M6 | 5263536  | Ali et al (2000)        |
| LOC_Os02g03100 | D8  | Oxidoreductase, aldo/keto reductase family protein | Penetrated root thickness            | 2 | R1483   | 744663   | RG437  | 6916662  | Zhang et al (2001a)     |
| LOC_Os02g03100 | D8  | Oxidoreductase, aldo/keto reductase family protein | Root dry weight                      | 2 | R1483   | 744663   | RG437  | 6916662  | Zhang et al (2001a)     |
| LOC_Os04g16734 | D9  | Maturase K                                         | Root dry weight in the 30-60cm layer | 4 | RM261   | 6574396  | RZ69   | 11234543 | Courtois et al (2003)   |
| LOC_Os04g16734 | D9  | Maturase K                                         | Deep root to shoot ratio             | 4 | RM261   | 6574396  | RZ69   | 11234543 | Courtois et al (2003)   |
| LOC_Os04g16734 | D9  | Maturase K                                         | Root number                          | 4 | RG190   | 8610617  | RG908  | 13635003 | Hemamalini et al (2000) |
| LOC_Os04g16734 | D9  | Maturase K                                         | Root dry weight                      | 4 | C820    | 6898105  | C933   | 12642399 | Xu et al (2004)         |
| LOC_Os04g16734 | D9  | Maturase K                                         | Root to shoot ratio                  | 4 | C820    | 6898105  | C933   | 12642399 | Xu et al (2004)         |
| LOC_Os04g16734 | D9  | Maturase K                                         | Deep root weight per tiller          | 4 | PC11M12 | 3571596  | PC28M1 | 11021724 | Kamoshita et al (2002b) |
| LOC_Os04g16734 | D9  | Maturase K                                         | Maximum root length                  | 4 | RG190   | 8610617  | C734A  | 16678378 | Price et al (2002c)     |
| LOC_Os04g16734 | D9  | Maturase K                                         | Deep root ratio                      | 4 | RM335   | 688353   | RM307  | 13141966 | Yue et al (2006)        |
| LOC_Os04g16734 | D9  | Maturase K                                         | Maximum root length                  | 4 | RM335   | 688353   | RM307  | 13141966 | Yue et al (2006)        |
| LOC_Os04g16824 | D10 | Chloroplast 30S ribosomal protein S3               | Root dry weight in the 30-60cm layer | 4 | RM261   | 6574396  | RZ69   | 11234543 | Courtois et al (2003)   |

|                |     |                                      |                             |    |         |         |         |          |                         |
|----------------|-----|--------------------------------------|-----------------------------|----|---------|---------|---------|----------|-------------------------|
| LOC_Os04g16824 | D10 | Chloroplast 30S ribosomal protein S3 | Deep root to shoot ratio    | 4  | RM261   | 6574396 | RZ69    | 11234543 | Courtois et al (2003)   |
| LOC_Os04g16824 | D10 | Chloroplast 30S ribosomal protein S3 | Root number                 | 4  | RG190   | 8610617 | RG908   | 13635003 | Hemamalini et al (2000) |
| LOC_Os04g16824 | D10 | Chloroplast 30S ribosomal protein S3 | Root dry weight             | 4  | C820    | 6898105 | C933    | 12642399 | Xu et al (2004)         |
| LOC_Os04g16824 | D10 | Chloroplast 30S ribosomal protein S3 | Root to shoot ratio         | 4  | C820    | 6898105 | C933    | 12642399 | Xu et al (2004)         |
| LOC_Os04g16824 | D10 | Chloroplast 30S ribosomal protein S3 | Deep root weight per tiller | 4  | PC11M12 | 3571596 | PC28M1  | 11021724 | Kamoshita et al (2002b) |
| LOC_Os04g16824 | D10 | Chloroplast 30S ribosomal protein S3 | Maximum root length         | 4  | RG190   | 8610617 | C734A   | 16678378 | Price et al (2002c)     |
| LOC_Os04g16824 | D10 | Chloroplast 30S ribosomal protein S3 | Deep root ratio             | 4  | RM335   | 688353  | RM307   | 13141966 | Yue et al (2006)        |
| LOC_Os04g16824 | D10 | Chloroplast 30S ribosomal protein S3 | Maximum root length         | 4  | RM335   | 688353  | RM307   | 13141966 | Yue et al (2006)        |
| LOC_Os01g08510 | D11 | MAR-binding filament-like protein 1  | Deep root ratio             | 1  | RG400   | 4058510 | R1194   | 4754502  | Kamoshita et al (2002a) |
| LOC_Os01g08510 | D11 | MAR-binding filament-like protein 1  | Deep root weight            | 1  | RG400   | 4058510 | RG532   | 5763641  | MacMillan et al (2006)  |
| LOC_Os01g08510 | D11 | MAR-binding filament-like protein 1  | Root number                 | 1  | RG246   | 3509004 | K5      | 5763641  | Zheng et al (2000)      |
| LOC_Os01g08510 | D11 | MAR-binding filament-like protein 1  | Deep root ratio             | 1  | RM428   | 2606364 | RM490   | 6676652  | Yue et al (2006)        |
| LOC_Os01g08510 | D11 | MAR-binding filament-like protein 1  | Root dry weight             | 1  | RM7383  | 3483439 | RM243   | 7970839  | Horii et al (2006)      |
| LOC_Os01g08510 | D11 | MAR-binding filament-like protein 1  | Maximum root length         | 1  | RM7383  | 3483439 | RM23    | 10704715 | Horii et al (2006)      |
| LOC_Os05g10830 | D12 | Proteophosphoglycan ppg4             | Root thickness              | 5  | R2232   | 4107103 | R569    | 6700408  | Price et al (2002c)     |
| LOC_Os05g10830 | D12 | Proteophosphoglycan ppg4             | Lateral root length         | 5  | RG313   | 2781980 | E1328   | 6944607  | Zheng et al (2003)      |
| LOC_Os05g10830 | D12 | Proteophosphoglycan ppg4             | Deep root ratio             | 5  | ME5_13  | 2781980 | G387    | 12454753 | Kamoshita et al (2002a) |
| LOC_Os05g10830 | D12 | Proteophosphoglycan ppg4             | Deep root weight per tiller | 5  | ME5_13  | 2781980 | G387    | 12454753 | Kamoshita et al (2002a) |
| LOC_Os05g10830 | D12 | Proteophosphoglycan ppg4             | Root volume                 | 5  | RZ556A  | 2091558 | RG403   | 12454753 | Hemamalini et al (2000) |
| LOC_Os05g10830 | D12 | Proteophosphoglycan ppg4             | Deep root to shoot ratio    | 5  | RZ556A  | 2091558 | RG403   | 12454753 | Yadav et al (1997)      |
| LOC_Os11g12040 | D13 | Disease resistance protein RPM1      | Maximum root length         | 11 | R2918   | 2449321 | C794    | 3035893  | Xu et al (2004)         |
| LOC_Os11g12040 | D13 | Disease resistance protein RPM1      | Deep root weight per tiller | 11 | C477    | 5460751 | EM17_10 | 6686558  | Kamoshita et            |

|                |     |                                      |                                      |    |        |          |        |          |                         |
|----------------|-----|--------------------------------------|--------------------------------------|----|--------|----------|--------|----------|-------------------------|
|                |     |                                      |                                      |    |        |          |        |          | al (2002a)              |
| LOC_Os11g12040 | D13 | Disease resistance protein RPM1      | Root growth rate in depth            | 11 | RM332  | 2840213  | RM167  | 4073313  | Yue et al (2006)        |
| LOC_Os11g12040 | D13 | Disease resistance protein RPM1      | Root dry weight                      | 11 | C794   | 3033385  | RG118  | 4414504  | Xu et al (2004)         |
| LOC_Os11g12040 | D13 | Disease resistance protein RPM1      | Root dry weight                      | 11 | C794   | 3033385  | RG118  | 4414504  | Xu et al (2004)         |
| LOC_Os11g12040 | D13 | Disease resistance protein RPM1      | Deep root weight                     | 11 | R642   | 2015713  | RZ141  | 4078514  | MacMillan et al (2006)  |
| LOC_Os11g12040 | D13 | Disease resistance protein RPM1      | Maximum root length                  | 11 | R642   | 2015713  | RZ141  | 4078514  | Price et al (1999)      |
| LOC_Os11g12040 | D13 | Disease resistance protein RPM1      | Deep root ratio                      | 11 | RM286  | 383711   | RM332  | 2840362  | Yue et al (2006)        |
| LOC_Os11g12040 | D13 | Disease resistance protein RPM1      | Deep root ratio                      | 11 | RM286  | 383711   | RM332  | 2840362  | Yue et al (2006)        |
| LOC_Os11g12040 | D13 | Disease resistance protein RPM1      | Maximum root length                  | 11 | RM286  | 383711   | RM332  | 2840362  | Yue et al (2006)        |
| LOC_Os11g12040 | D13 | Disease resistance protein RPM1      | Root thickness                       | 11 | OSR1   | 201993   | RM202  | 9001898  | Li et al (2005)         |
| LOC_Os10g36190 | D14 | PPR repeat domain containing protein | Root dry weight in the 60-90cm layer | 10 | RM258  | 18014265 | RG134  | 19823295 | Courtois et al (2003)   |
| LOC_Os02g37420 | D15 | Ras-related protein                  | Maximum root length                  | 2  | RM3762 | 22456471 | RM526  | 26665181 | Yue et al (2006)        |
| LOC_Os02g37420 | D15 | Ras-related protein                  | Root thickness                       | 2  | RG157  | 19865083 | RZ318  | 24566168 | Hemamalini et al (2000) |
| LOC_Os02g37420 | D15 | Ras-related protein                  | Root thickness                       | 2  | RG157  | 19865083 | RZ318  | 24566168 | Hemamalini et al (2000) |
| LOC_Os02g37420 | D15 | Ras-related protein                  | Penetrated root number               | 2  | RG171  | 17484665 | G45    | 22596168 | Price et al (2000)      |
| LOC_Os02g37420 | D15 | Ras-related protein                  | Root thickness                       | 2  | A18438 | 22595831 | G39    | 27034665 | MacMillan et al (2006)  |
| LOC_Os02g37420 | D15 | Ras-related protein                  | Root thickness                       | 2  | A18438 | 22595831 | G39    | 27034665 | Price et al (2002c)     |
| LOC_Os02g37420 | D15 | Ras-related protein                  | Penetrated root number               | 2  | C499   | 20878430 | PC11M1 | 31106875 | Ali et al (2000)        |
| LOC_Os02g37420 | D15 | Ras-related protein                  | Root penetration index               | 2  | C499   | 20878430 | PC11M1 | 31106875 | Ali et al (2000)        |
| LOC_Os02g37420 | D15 | Ras-related protein                  | Penetrated root number               | 2  | PC33M8 | 20878430 | PC21M1 | 31106875 | Ali et al (2000)        |
| LOC_Os02g37420 | D15 | Ras-related protein                  | Penetrated root number               | 2  | PC33M8 | 20878430 | PC21M1 | 31106875 | Ali et al (2000)        |
| LOC_Os02g37420 | D15 | Ras-related protein                  | Root penetration index               | 2  | PC33M8 | 20878430 | PC21M1 | 31106875 | Ali et al (2000)        |

|                |     |                                                      |                                      |    |         |          |          |          |                         |
|----------------|-----|------------------------------------------------------|--------------------------------------|----|---------|----------|----------|----------|-------------------------|
| LOC_Os02g37420 | D15 | Ras-related protein                                  | Root penetration index               | 2  | PC33M8  | 20878430 | PC21M1   | 31106875 | Ali et al (2000)        |
| LOC_Os02g37420 | D15 | Ras-related protein                                  | Penetrated root number               | 2  | AA7_2B  | 20878430 | AA7_2A   | 33850388 | Ali et al (2000)        |
| LOC_Os02g37420 | D15 | Ras-related protein                                  | Root penetration index               | 2  | AA7_2B  | 20878430 | AA7_2A   | 33850388 | Ali et al (2000)        |
| LOC_Os02g37420 | D15 | Ras-related protein                                  | Root fresh weight                    | 2  | G1327   | 4524663  | RM263    | 25865568 | Li et al (2005)         |
| LOC_Os07g09890 | U1  | Hexokinase                                           | Deep root weight                     | 7  | RZ488   | 4573513  | RG477    | 6779821  | Courtois et al (2003)   |
| LOC_Os07g09890 | U1  | Hexokinase                                           | Root number                          | 7  | PC75M8  | 2678661  | PC32M1   | 17820931 | Ali et al (2000)        |
| LOC_Os08g02050 | U2  | Protein kinase family protein                        | Root thickness                       | 8  | RM337   | 152299   | P0498H04 | 729015   | Price et al (1999)      |
| LOC_Os08g02050 | U2  | Protein kinase family protein                        | Root thickness                       | 8  | PC27M15 | 460381   | C1121    | 5327118  | Kamoshita et al (2002b) |
| LOC_Os10g28360 | U3  | 1,2-dihydroxy-3-keto-5-methylthiopentene dioxygenase | Maximum root length                  | 10 | C1633   | 14607047 | C677     | 16410869 | Xu et al (2004)         |
| LOC_Os10g28360 | U3  | 1,2-dihydroxy-3-keto-5-methylthiopentene dioxygenase | Root penetration index               | 10 | RZ892A  | 12902744 | BCD386   | 19023681 | Ali et al (2000)        |
| LOC_Os10g28360 | U3  | 1,2-dihydroxy-3-keto-5-methylthiopentene dioxygenase | Penetrated root thickness            | 10 | RZ892A  | 12902744 | BCD386   | 19023681 | Ali et al (2000)        |
| LOC_Os07g44430 | U4  | Peroxiredoxin                                        | Maximum root length                  | 7  | RM234   | 25472688 | C507     | 26705745 | Price et al (1999)      |
| LOC_Os07g44430 | U4  | Peroxiredoxin                                        | Deep root weight per tiller          | 7  | CDO497  | 25103215 | CDO418   | 26916502 | Yadav et al (1997)      |
| LOC_Os07g44430 | U4  | Peroxiredoxin                                        | Maximum root length                  | 7  | CDO497  | 25103215 | CDO418   | 26916502 | Yadav et al (1997)      |
| LOC_Os07g44430 | U4  | Peroxiredoxin                                        | Root dry weight in the 00-30cm layer | 7  | RG146B  | 25989310 | RM248    | 29340115 | Courtois et al (2003)   |
| LOC_Os07g44430 | U4  | Peroxiredoxin                                        | Root thickness                       | 7  | RM47    | 25806439 | RM172    | 29561451 | Li et al (2005)         |
| LOC_Os07g44430 | U4  | Peroxiredoxin                                        | Root dry weight                      | 7  | RM47    | 25806439 | RM172    | 29561451 | Li et al (2005)         |
| LOC_Os07g44430 | U4  | Peroxiredoxin                                        | Maximum root length                  | 7  | ME7_1   | 23178645 | EM18_4   | 28792010 | Kamoshita et al (2002a) |
| LOC_Os07g46550 | U6  | Annexin                                              | Root penetration index               | 7  | CDO418  | 26912502 | RZ978    | 28411821 | Zheng et al (2000)      |
| LOC_Os07g46550 | U6  | Annexin                                              | Root dry weight                      | 7  | CDO418  | 26912502 | RZ978    | 28411821 | Yadav et al (1997)      |
| LOC_Os07g46550 | U6  | Annexin                                              | Deep root weight                     | 7  | CDO418  | 26912502 | RZ978    | 28411821 | Yadav et al (1997)      |
| LOC_Os07g46550 | U6  | Annexin                                              | Deep root to shoot ratio             | 7  | CDO418  | 26912502 | RZ978    | 28411821 | Yadav et al             |



|                |     |                                             |                                      |   |         |          |         |          |                         |
|----------------|-----|---------------------------------------------|--------------------------------------|---|---------|----------|---------|----------|-------------------------|
|                |     |                                             |                                      |   |         |          |         |          | (1997)                  |
| LOC_Os07g46550 | U6  | Annexin                                     | Deep root ratio                      | 7 | RM134   | 26636534 | RM248   | 29340115 | Yue et al (2006)        |
| LOC_Os07g46550 | U6  | Annexin                                     | Root growth rate in volume           | 7 | RM134   | 26636534 | RM248   | 29340115 | Yue et al (2006)        |
| LOC_Os07g46550 | U6  | Annexin                                     | Maximum root length                  | 7 | A123714 | 26704922 | A123612 | 29467498 | Price et al (2002c)     |
| LOC_Os07g46550 | U6  | Annexin                                     | Root dry weight in the 00-30cm layer | 7 | RG146B  | 25989310 | RM248   | 29340115 | Courtois et al (2003)   |
| LOC_Os07g46550 | U6  | Annexin                                     | Root thickness                       | 7 | RM47    | 25806439 | RM172   | 29561451 | Li et al (2005)         |
| LOC_Os07g46550 | U6  | Annexin                                     | Root dry weight                      | 7 | RM47    | 25806439 | RM172   | 29561451 | Li et al (2005)         |
| LOC_Os07g46550 | U6  | Annexin                                     | Maximum root length                  | 7 | ME7_1   | 23178645 | EM18_4  | 28792010 | Kamoshita et al (2002a) |
| LOC_Os08g40090 | U7  | Leucine rich repeat containing protein      | Deep root number                     | 8 | R202    | 24185548 | RG598   | 27735535 | Price et al (2002c)     |
| LOC_Os08g40090 | U7  | Leucine rich repeat containing protein      | Maximum root length                  | 8 | R202    | 24185548 | RG598   | 27735535 | Price et al (2002c)     |
| LOC_Os08g40090 | U7  | Leucine rich repeat containing protein      | Root thickness                       | 8 | RZ997A  | 22925855 | RZ572   | 27555414 | Nguyen et al (2004)     |
| LOC_Os04g24610 | U9  | Expressed protein                           | Maximum root length                  | 4 | RM307   | 13141838 | RM471   | 18824943 | Yue et al (2006)        |
| LOC_Os04g24610 | U9  | Expressed protein                           | Root thickness                       | 4 | RZ69    | 11234426 | RG449   | 17696172 | Courtois et al (2003)   |
| LOC_Os04g24610 | U9  | Expressed protein                           | Deep root weight                     | 4 | RZ69    | 11234426 | RG449   | 17696172 | Courtois et al (2003)   |
| LOC_Os04g24610 | U9  | Expressed protein                           | Deep root weight per tiller          | 4 | RZ69    | 11234426 | RG449   | 17696172 | Courtois et al (2003)   |
| LOC_Os04g24610 | U9  | Expressed protein                           | Maximum root length                  | 4 | RG190   | 8610617  | C734A   | 16678378 | Price et al (2002c)     |
| LOC_Os04g24610 | U9  | Expressed protein                           | Root penetration index               | 4 | EM14_5  | 11234426 | ME2_13  | 21453222 | Nguyen et al (2004)     |
| LOC_Os04g24610 | U9  | Expressed protein                           | Root penetration index               | 4 | RZ69    | 11234426 | RZ565   | 21453222 | Zhang et al (2001a)     |
| LOC_Os03g18850 | U10 | Pathogenesis-related Bet v I family protein | Root penetration index               | 3 | RG369   | 8964495  | R2170   | 14291501 | Zhang et al (2001a)     |
| LOC_Os03g18850 | U10 | Pathogenesis-related Bet v I family protein | Root pulling force                   | 3 | RG369   | 8964495  | R2170   | 14291501 | Zhang et al (2001a)     |
| LOC_Os03g18850 | U10 | Pathogenesis-related Bet v I family protein | Maximum root length                  | 3 | RG191   | 5729669  | A12451  | 12147899 | Price et al (2002c)     |
| LOC_Os03g18850 | U10 | Pathogenesis-related Bet v I family         | Root thickness                       | 3 | RG191   | 5729669  | A12451  | 12147899 | Price et al             |

|                |     |                                                                          |                        |   |          |          |          |          |                         |
|----------------|-----|--------------------------------------------------------------------------|------------------------|---|----------|----------|----------|----------|-------------------------|
|                |     | protein                                                                  |                        |   |          |          |          |          | (2002c)                 |
| LOC_Os03g18850 | U10 | Pathogenesis-related Bet v I family protein                              | Lateral root number    | 3 | RG191    | 5729669  | AAC_CAG5 | 12407510 | Zheng et al (2003)      |
| LOC_Os03g18850 | U10 | Pathogenesis-related Bet v I family protein                              | Root dry weight        | 3 | RZ536C   | 5729669  | RZ284    | 15472481 | Courtois et al (2003)   |
| LOC_Os03g18850 | U10 | Pathogenesis-related Bet v I family protein                              | Root fresh weight      | 3 | RM60     | 105852   | C814B    | 17113562 | Li et al (2005)         |
| LOC_Os03g18850 | U10 | Pathogenesis-related Bet v I family protein                              | Lateral root length    | 3 | RG409A   | 3495798  | T17      | 24086309 | Zheng et al (2003)      |
| LOC_Os03g18850 | U10 | Pathogenesis-related Bet v I family protein                              | Deep root weight       | 3 | PC20M11  | 5729669  | PC20M12  | 27128592 | Kamoshita et al (2002b) |
| LOC_Os03g18850 | U10 | Pathogenesis-related Bet v I family protein                              | Deep root ratio        | 3 | PC20M11  | 5729669  | PC20M12  | 27128592 | Kamoshita et al (2002b) |
| LOC_Os03g18850 | U10 | Pathogenesis-related Bet v I family protein                              | Penetrated root number | 3 | PC73M13  | 5729669  | PC3M5    | 27128592 | Ali et al (2000)        |
| LOC_Os03g18850 | U10 | Pathogenesis-related Bet v I family protein                              | Penetrated root number | 3 | PC73M13  | 5729669  | PC3M5    | 27128592 | Ali et al (2000)        |
| LOC_Os03g18850 | U10 | Pathogenesis-related Bet v I family protein                              | Root penetration index | 3 | PC73M13  | 5729669  | PC3M5    | 27128592 | Ali et al (2000)        |
| LOC_Os03g18850 | U10 | Pathogenesis-related Bet v I family protein                              | Root penetration index | 3 | PC73M13  | 5729669  | PC3M5    | 27128592 | Ali et al (2000)        |
| LOC_Os03g18850 | U10 | Pathogenesis-related Bet v I family protein                              | Root to shoot ratio    | 3 | RM231    | 2453085  | G51      | 28528927 | Li et al (2005)         |
| LOC_Os08g06060 | U11 | CGMC_MAPKCMGC_2_ERK.13 - CGMC includes CDA, MAPK, GSK3, and CLKC kinases | Root thickness         | 8 | P0680F05 | 1996979  | R902     | 4688027  | MacMillan et al (2006)  |
| LOC_Os08g06060 | U11 | CGMC_MAPKCMGC_2_ERK.13 - CGMC includes CDA, MAPK, GSK3, and CLKC kinases | Penetrated root number | 8 | P0680F05 | 1996979  | R902     | 4688027  | Price et al (2000)      |
| LOC_Os08g06060 | U11 | CGMC_MAPKCMGC_2_ERK.13 - CGMC includes CDA, MAPK, GSK3, and CLKC kinases | Root penetration index | 8 | P0680F05 | 1996979  | R902     | 4688027  | Price et al (2000)      |
| LOC_Os08g06060 | U11 | CGMC_MAPKCMGC_2_ERK.13 - CGMC includes CDA, MAPK, GSK3, and CLKC kinases | Root thickness         | 8 | PC27M15  | 460381   | C1121    | 5327118  | Kamoshita et al (2002b) |
| LOC_Os05g28530 | U12 | Glutaredoxin                                                             | Root dry weight        | 5 | RG403    | 12454537 | RG13     | 18875558 | Yadav et al (1997)      |
| LOC_Os05g28530 | U12 | Glutaredoxin                                                             | Root pulling force     | 5 | RG403    | 12454537 | RM164    | 19196736 | Zhang et al (2001a)     |
| LOC_Os05g28530 | U12 | Glutaredoxin                                                             | Maximum root length    | 5 | R569     | 6699817  | RG13     | 18875558 | Price et al (1999)      |

|                |     |                       |                                      |    |        |          |           |          |                         |
|----------------|-----|-----------------------|--------------------------------------|----|--------|----------|-----------|----------|-------------------------|
| LOC_Os04g50790 | U13 | RNA recognition motif | Root thickness                       | 4  | RZ23   | 29862697 | RM255     | 30772540 | Courtois et al (2003)   |
| LOC_Os04g50790 | U13 | RNA recognition motif | Root penetration index               | 4  | RG939  | 27292850 | RG476B    | 31065616 | Zhang et al (2001a)     |
| LOC_Os04g50790 | U13 | RNA recognition motif | Root thickness                       | 4  | RG939  | 27292850 | RG476B    | 31065616 | Zhang et al (2001a)     |
| LOC_Os04g50790 | U13 | RNA recognition motif | Penetrated root thickness            | 4  | RG939  | 27292850 | RG476B    | 31065616 | Zhang et al (2001a)     |
| LOC_Os04g50790 | U13 | RNA recognition motif | Penetrated root dry weight           | 4  | RG939  | 27292850 | RG476B    | 31065616 | Zhang et al (2001a)     |
| LOC_Os04g50790 | U13 | RNA recognition motif | Penetrated root thickness            | 4  | RG939  | 27292850 | RZ905     | 31065616 | Nguyen et al (2004)     |
| LOC_Os04g50790 | U13 | RNA recognition motif | Root thickness                       | 4  | RG939  | 27292850 | RZ905     | 31065616 | Nguyen et al (2004)     |
| LOC_Os04g50790 | U13 | RNA recognition motif | Maximum root length                  | 4  | RG163  | 27292850 | RZ590     | 32449446 | Hemamalini et al (2000) |
| LOC_Os04g50790 | U13 | RNA recognition motif | Penetrated root thickness            | 4  | RG163  | 27292850 | RZ590     | 32449446 | Zheng et al (2000)      |
| LOC_Os04g50790 | U13 | RNA recognition motif | Root number                          | 4  | RG163  | 27292850 | RM349     | 32499619 | Price et al (2000)      |
| LOC_Os04g50790 | U13 | RNA recognition motif | Root to shoot ratio                  | 4  | RG163  | 27292850 | RM349     | 32499619 | Price et al (2002c)     |
| LOC_Os04g50790 | U13 | RNA recognition motif | Lateral root number                  | 4  | RM252  | 25178944 | AGG_CA G7 | 34828907 | Zheng et al (2003)      |
| LOC_Os12g06560 | U14 | Expressed protein     | Root to shoot ratio                  | 11 | Y6854L | 26967740 | RM224     | 27202086 | Xu et al (2004)         |
| LOC_Os12g06560 | U14 | Expressed protein     | Root thickness                       | 11 | G181   | 26210617 | RM224     | 27202086 | Li et al (2005)         |
| LOC_Os12g06560 | U14 | Expressed protein     | Root dry weight                      | 11 | G181   | 26210617 | RM224     | 27202086 | Li et al (2005)         |
| LOC_Os12g06560 | U14 | Expressed protein     | Penetrated root length               | 11 | G1465  | 24200468 | C950      | 26041524 | Zhang et al (2001a)     |
| LOC_Os12g06560 | U14 | Expressed protein     | Penetrated root length               | 11 | G1465  | 24200468 | C950      | 26041524 | Nguyen et al (2004)     |
| LOC_Os12g06560 | U14 | Expressed protein     | Root pulling force                   | 11 | ME2_6  | 19172832 | RM21      | 19173094 | Nguyen et al (2004)     |
| LOC_Os12g06560 | U14 | Expressed protein     | Root dry weight in the 00-30cm layer | 11 | RM21   | 19172832 | CDO365    | 19565672 | Courtois et al (2003)   |
| LOC_Os12g06560 | U14 | Expressed protein     | Root dry weight in the 60-90cm layer | 11 | RM21   | 19172832 | CDO365    | 19565672 | Courtois et al (2003)   |
| LOC_Os12g06560 | U14 | Expressed protein     | Root dry weight                      | 11 | RM21   | 19172832 | CDO365    | 19565672 | Courtois et al (2003)   |
| LOC_Os12g06560 | U14 | Expressed protein     | Root thickness                       | 11 | C189   | 21425337 | OSJNBA0   | 22099273 | MacMillan et            |

|                |     |                   |                             |    |                   |          |                   |          |                            |
|----------------|-----|-------------------|-----------------------------|----|-------------------|----------|-------------------|----------|----------------------------|
|                |     |                   |                             |    |                   |          | 074L11            |          | al (2006)                  |
| LOC_Os12g06560 | U14 | Expressed protein | Penetrated root number      | 11 | C189              | 21425337 | OSJNBA0<br>074L11 | 22099273 | Price et al<br>(2000)      |
| LOC_Os12g06560 | U14 | Expressed protein | Root penetration index      | 11 | C189              | 21425337 | OSJNBA0<br>074L11 | 22099273 | Price et al<br>(2000)      |
| LOC_Os12g06560 | U14 | Expressed protein | Maximum root length         | 11 | C189              | 21425337 | OSJNBA0<br>074L11 | 22099273 | Price et al<br>(2002c)     |
| LOC_Os12g06560 | U14 | Expressed protein | Root to total biomass ratio | 11 | OSJNBA0<br>074L11 | 22095414 | OSJNBA0<br>007P22 | 22840721 | MacMillan et<br>al (2006)  |
| LOC_Os12g06560 | U14 | Expressed protein | Root number                 | 11 | OSJNBA0<br>074L11 | 22095414 | OSJNBA0<br>007P22 | 22840721 | Price et al<br>(2000)      |
| LOC_Os12g06560 | U14 | Expressed protein | Root thickness              | 11 | OSJNBA0<br>074L11 | 22095414 | OSJNBA0<br>007P22 | 22840721 | Price et al<br>(2002c)     |
| LOC_Os12g06560 | U14 | Expressed protein | Root to shoot ratio         | 11 | RM229             | 18407879 | RM21              | 19173094 | Li et al (2005)            |
| LOC_Os12g06560 | U14 | Expressed protein | Deep root ratio             | 11 | PC41M14           | 17353847 | PC48M15           | 18179510 | Kamoshita et<br>al (2002b) |
| LOC_Os12g06560 | U14 | Expressed protein | Deep root weight            | 11 | PC48M15           | 17353847 | PC31M8            | 18179510 | Kamoshita et<br>al (2002b) |
| LOC_Os12g06560 | U14 | Expressed protein | Penetrated root length      | 11 | PC74M2            | 19563844 | RG103             | 20337612 | Ali et al<br>(2000)        |
| LOC_Os12g06560 | U14 | Expressed protein | Deep root weight per tiller | 11 | C477              | 5460751  | EM17_10           | 6686558  | Kamoshita et<br>al (2002a) |
| LOC_Os12g06560 | U14 | Expressed protein | Maximum root length         | 11 | G4001             | 22816378 | RM254             | 23764518 | Xu et al (2004)            |
| LOC_Os12g06560 | U14 | Expressed protein | Maximum root length         | 11 | RM206             | 22014679 | RG1109            | 23155291 | Kamoshita et<br>al (2002a) |
| LOC_Os12g06560 | U14 | Expressed protein | Root growth rate in depth   | 11 | RM332             | 2840213  | RM167             | 4073313  | Yue et al<br>(2006)        |
| LOC_Os12g06560 | U14 | Expressed protein | Root dry weight             | 11 | C794              | 3033385  | RG118             | 4414504  | Xu et al (2004)            |
| LOC_Os12g06560 | U14 | Expressed protein | Root dry weight             | 11 | C794              | 3033385  | RG118             | 4414504  | Xu et al (2004)            |
| LOC_Os12g06560 | U14 | Expressed protein | Deep root ratio             | 11 | RM287             | 16767319 | RM229             | 18408009 | Yue et al<br>(2006)        |
| LOC_Os12g06560 | U14 | Expressed protein | Maximum root length         | 11 | RM287             | 16767319 | RM229             | 18408009 | Yue et al<br>(2006)        |
| LOC_Os12g06560 | U14 | Expressed protein | Root growth rate in depth   | 11 | RM287             | 16767319 | RM229             | 18408009 | Yue et al<br>(2006)        |
| LOC_Os12g06560 | U14 | Expressed protein | Root growth rate in depth   | 11 | RM287             | 16767319 | RM229             | 18408009 | Yue et al<br>(2006)        |
| LOC_Os12g06560 | U14 | Expressed protein | Deep root weight            | 11 | G257              | 17353847 | ME2_6             | 19173094 | Kamoshita et<br>al (2002a) |



|                |     |                                 |                             |    |       |          |          |          |                         |
|----------------|-----|---------------------------------|-----------------------------|----|-------|----------|----------|----------|-------------------------|
| LOC_Os12g06560 | U14 | Expressed protein               | Deep root weight            | 11 | G257  | 17353847 | ME2_6    | 19173094 | Kamoshita et al (2002a) |
| LOC_Os12g06560 | U14 | Expressed protein               | Deep root ratio             | 11 | G257  | 17353847 | ME2_6    | 19173094 | Kamoshita et al (2002a) |
| LOC_Os12g06560 | U14 | Expressed protein               | Root pulling force          | 11 | G257  | 17353847 | RM21     | 19173094 | Zhang et al (2001a)     |
| LOC_Os12g06560 | U14 | Expressed protein               | Deep root weight            | 11 | R642  | 2015713  | RZ141    | 4078514  | MacMillan et al (2006)  |
| LOC_Os12g06560 | U14 | Expressed protein               | Maximum root length         | 11 | R642  | 2015713  | RZ141    | 4078514  | Price et al (1999)      |
| LOC_Os12g06560 | U14 | Expressed protein               | Deep root ratio             | 11 | ME6_7 | 19563844 | ME7_2    | 22014851 | Kamoshita et al (2002a) |
| LOC_Os12g06560 | U14 | Expressed protein               | Deep root weight per tiller | 11 | ME7_2 | 19563844 | EM18_19  | 22014851 | Kamoshita et al (2002a) |
| LOC_Os12g06560 | U14 | Expressed protein               | Root thickness              | 11 | ME7_2 | 19563844 | EM18_19  | 22014851 | Kamoshita et al (2002a) |
| LOC_Os12g06560 | U14 | Expressed protein               | Root thickness              | 11 | RM229 | 18407879 | C189     | 21426217 | MacMillan et al (2006)  |
| LOC_Os12g06560 | U14 | Expressed protein               | Root thickness              | 11 | RM229 | 18407879 | C189     | 21426217 | Price et al (2002c)     |
| LOC_Os12g06560 | U14 | Expressed protein               | Root growth rate in volume  | 11 | RM202 | 9001608  | RM287    | 16767617 | Yue et al (2006)        |
| LOC_Os12g06560 | U14 | Expressed protein               | Root growth rate in volume  | 11 | RM202 | 9001608  | RM287    | 16767617 | Yue et al (2006)        |
| LOC_Os12g06560 | U14 | Expressed protein               | Root growth rate in volume  | 11 | RM202 | 9001608  | RM287    | 16767617 | Yue et al (2006)        |
| LOC_Os12g06560 | U14 | Expressed protein               | Root growth rate in volume  | 11 | RM202 | 9001608  | RM287    | 16767617 | Yue et al (2006)        |
| LOC_Os12g06560 | U14 | Expressed protein               | Root dry weight             | 11 | RM202 | 9001608  | RM21     | 19173094 | Horii et al (2006)      |
| LOC_Os12g06560 | U14 | Expressed protein               | Root branching index        | 11 | RM202 | 9001608  | RM21     | 19173094 | Horii et al (2006)      |
| LOC_Os12g06560 | U14 | Expressed protein               | Root thickness              | 11 | OSR1  | 201993   | RM202    | 9001898  | Li et al (2005)         |
| LOC_Os12g06560 | U14 | Expressed protein               | Deep root number            | 12 | RM247 | 3185384  | G124     | 4103357  | Price et al (2002c)     |
| LOC_Os01g68630 | U15 | Leaf senescence related protein | Deep root weight            | 1  | RZ14  | 39687395 | P0678F11 | 40216906 | MacMillan et al (2006)  |
| LOC_Os01g68630 | U15 | Leaf senescence related protein | Deep root weight            | 1  | RZ14  | 39687395 | P0678F11 | 40216906 | MacMillan et al (2006)  |
| LOC_Os01g68630 | U15 | Leaf senescence related protein | Maximum root length         | 1  | RZ14  | 39687395 | P0678F11 | 40216906 | MacMillan et al (2006)  |

|                |     |                                 |                             |   |         |          |          |          |                         |
|----------------|-----|---------------------------------|-----------------------------|---|---------|----------|----------|----------|-------------------------|
| LOC_Os01g68630 | U15 | Leaf senescence related protein | Maximum root length         | 1 | RZ14    | 39687395 | P0678F11 | 40216906 | MacMillan et al (2006)  |
| LOC_Os01g68630 | U15 | Leaf senescence related protein | Deep root number            | 1 | RZ14    | 39687395 | P0678F11 | 40216906 | Price et al (2002c)     |
| LOC_Os01g68630 | U15 | Leaf senescence related protein | Maximum root length         | 1 | RZ14    | 39687395 | P0678F11 | 40216906 | Price et al (2002c)     |
| LOC_Os01g68630 | U15 | Leaf senescence related protein | Root thickness              | 1 | RZ14    | 39687395 | RZ801    | 40566030 | Courtois et al (2003)   |
| LOC_Os01g68630 | U15 | Leaf senescence related protein | Root dry weight             | 1 | RZ649B  | 39433049 | RZ801    | 40566030 | Courtois et al (2003)   |
| LOC_Os01g68630 | U15 | Leaf senescence related protein | Root growth rate in volume  | 1 | RM472   | 37889242 | RM104    | 40167060 | Yue et al (2006)        |
| LOC_Os01g68630 | U15 | Leaf senescence related protein | Root growth rate in volume  | 1 | RM472   | 37889242 | RM104    | 40167060 | Yue et al (2006)        |
| LOC_Os01g68630 | U15 | Leaf senescence related protein | Root volume                 | 1 | RM472   | 37889242 | RM104    | 40167060 | Yue et al (2006)        |
| LOC_Os01g68630 | U15 | Leaf senescence related protein | Root volume                 | 1 | RM472   | 37889242 | RM104    | 40167060 | Yue et al (2006)        |
| LOC_Os01g68630 | U15 | Leaf senescence related protein | Penetrated root thickness   | 1 | RZ730   | 34940404 | RZ801    | 40566030 | Zheng et al (2000)      |
| LOC_Os01g68630 | U15 | Leaf senescence related protein | Deep root weight            | 1 | RZ730   | 34940404 | RZ801    | 40566030 | Yadav et al (1997)      |
| LOC_Os01g68630 | U15 | Leaf senescence related protein | Deep root weight per tiller | 1 | RZ730   | 34940404 | RZ801    | 40566030 | Yadav et al (1997)      |
| LOC_Os01g68630 | U15 | Leaf senescence related protein | Root thickness              | 1 | PC31M10 | 33053493 | PC32M5   | 40700598 | Kamoshita et al (2002b) |
| LOC_Os01g68630 | U15 | Leaf senescence related protein | Root thickness              | 1 | C904    | 13902370 | C742     | 40919568 | Li et al (2005)         |
| LOC_Os01g68630 | U15 | Leaf senescence related protein | Penetrated root length      | 1 | PC15M10 | 40700034 | PC17M5   | 33958675 | Ali et al (2000)        |
| LOC_Os01g68630 | U15 | Leaf senescence related protein | Penetrated root thickness   | 1 | PC3M3   | 40700034 | PC15M11  | 33958675 | Ali et al (2000)        |
| LOC_Os07g31370 | U16 | Ras-related protein             | Maximum root length         | 7 | G20     | 17526417 | C451     | 20346668 | Price et al (1999)      |
| LOC_Os07g31370 | U16 | Ras-related protein             | Root volume                 | 7 | RZ337B  | 17161471 | CDO497   | 25103438 | Hemamalini et al (2000) |
| LOC_Os07g31370 | U16 | Ras-related protein             | Penetrated root number      | 7 | RZ337B  | 17161471 | CDO497   | 25103438 | Zheng et al (2000)      |
| LOC_Os07g31370 | U16 | Ras-related protein             | Root thickness              | 7 | RZ337B  | 17161471 | RM234    | 25472820 | Courtois et al (2003)   |
| LOC_Os07g31370 | U16 | Ras-related protein             | Root number                 | 7 | PGMS0_7 | 6779215  | CDO59    | 20732663 | Hemamalini et al (2000) |

|                |     |                                    |                                      |    |               |          |               |          |                         |
|----------------|-----|------------------------------------|--------------------------------------|----|---------------|----------|---------------|----------|-------------------------|
| LOC_Os11g45180 | U18 | NBS-LRR disease resistance protein | Root to shoot ratio                  | 11 | Y6854L        | 26967740 | RM224         | 27202086 | Xu et al (2004)         |
| LOC_Os11g45180 | U18 | NBS-LRR disease resistance protein | Root thickness                       | 11 | G181          | 26210617 | RM224         | 27202086 | Li et al (2005)         |
| LOC_Os11g45180 | U18 | NBS-LRR disease resistance protein | Root dry weight                      | 11 | G181          | 26210617 | RM224         | 27202086 | Li et al (2005)         |
| LOC_Os11g45180 | U18 | NBS-LRR disease resistance protein | Penetrated root length               | 11 | G1465         | 24200468 | C950          | 26041524 | Zhang et al (2001a)     |
| LOC_Os11g45180 | U18 | NBS-LRR disease resistance protein | Penetrated root length               | 11 | G1465         | 24200468 | C950          | 26041524 | Nguyen et al (2004)     |
| LOC_Os11g45180 | U18 | NBS-LRR disease resistance protein | Root pulling force                   | 11 | ME2_6         | 19172832 | RM21          | 19173094 | Nguyen et al (2004)     |
| LOC_Os11g45180 | U18 | NBS-LRR disease resistance protein | Maximum root length                  | 11 | R2918         | 2449321  | C794          | 3035893  | Xu et al (2004)         |
| LOC_Os11g45180 | U18 | NBS-LRR disease resistance protein | Root dry weight in the 00-30cm layer | 11 | RM21          | 19172832 | CDO365        | 19565672 | Courtois et al (2003)   |
| LOC_Os11g45180 | U18 | NBS-LRR disease resistance protein | Root dry weight in the 60-90cm layer | 11 | RM21          | 19172832 | CDO365        | 19565672 | Courtois et al (2003)   |
| LOC_Os11g45180 | U18 | NBS-LRR disease resistance protein | Root dry weight                      | 11 | RM21          | 19172832 | CDO365        | 19565672 | Courtois et al (2003)   |
| LOC_Os11g45180 | U18 | NBS-LRR disease resistance protein | Root thickness                       | 11 | C189          | 21425337 | OSJNBA0074L11 | 22099273 | MacMillan et al (2006)  |
| LOC_Os11g45180 | U18 | NBS-LRR disease resistance protein | Penetrated root number               | 11 | C189          | 21425337 | OSJNBA0074L11 | 22099273 | Price et al (2000)      |
| LOC_Os11g45180 | U18 | NBS-LRR disease resistance protein | Root penetration index               | 11 | C189          | 21425337 | OSJNBA0074L11 | 22099273 | Price et al (2000)      |
| LOC_Os11g45180 | U18 | NBS-LRR disease resistance protein | Maximum root length                  | 11 | C189          | 21425337 | OSJNBA0074L11 | 22099273 | Price et al (2002c)     |
| LOC_Os11g45180 | U18 | NBS-LRR disease resistance protein | Root to total biomass ratio          | 11 | OSJNBA0074L11 | 22095414 | OSJNBA0007P22 | 22840721 | MacMillan et al (2006)  |
| LOC_Os11g45180 | U18 | NBS-LRR disease resistance protein | Root number                          | 11 | OSJNBA0074L11 | 22095414 | OSJNBA0007P22 | 22840721 | Price et al (2000)      |
| LOC_Os11g45180 | U18 | NBS-LRR disease resistance protein | Root thickness                       | 11 | OSJNBA0074L11 | 22095414 | OSJNBA0007P22 | 22840721 | Price et al (2002c)     |
| LOC_Os11g45180 | U18 | NBS-LRR disease resistance protein | Root to shoot ratio                  | 11 | RM229         | 18407879 | RM21          | 19173094 | Li et al (2005)         |
| LOC_Os11g45180 | U18 | NBS-LRR disease resistance protein | Deep root ratio                      | 11 | PC41M14       | 17353847 | PC48M15       | 18179510 | Kamoshita et al (2002b) |
| LOC_Os11g45180 | U18 | NBS-LRR disease resistance protein | Deep root weight                     | 11 | PC48M15       | 17353847 | PC31M8        | 18179510 | Kamoshita et al (2002b) |
| LOC_Os11g45180 | U18 | NBS-LRR disease resistance protein | Penetrated root length               | 11 | PC74M2        | 19563844 | RG103         | 20337612 | Ali et al (2000)        |
| LOC_Os11g45180 | U18 | NBS-LRR disease resistance protein | Deep root weight per tiller          | 11 | C477          | 5460751  | EM17_10       | 6686558  | Kamoshita et al (2002a) |

|                |     |                                    |                             |    |       |          |         |          |                         |
|----------------|-----|------------------------------------|-----------------------------|----|-------|----------|---------|----------|-------------------------|
| LOC_Os11g45180 | U18 | NBS-LRR disease resistance protein | Maximum root length         | 11 | G4001 | 22816378 | RM254   | 23764518 | Xu et al (2004)         |
| LOC_Os11g45180 | U18 | NBS-LRR disease resistance protein | Maximum root length         | 11 | RM206 | 22014679 | RG1109  | 23155291 | Kamoshita et al (2002a) |
| LOC_Os11g45180 | U18 | NBS-LRR disease resistance protein | Root growth rate in depth   | 11 | RM332 | 2840213  | RM167   | 4073313  | Yue et al (2006)        |
| LOC_Os11g45180 | U18 | NBS-LRR disease resistance protein | Root dry weight             | 11 | C794  | 3033385  | RG118   | 4414504  | Xu et al (2004)         |
| LOC_Os11g45180 | U18 | NBS-LRR disease resistance protein | Root dry weight             | 11 | C794  | 3033385  | RG118   | 4414504  | Xu et al (2004)         |
| LOC_Os11g45180 | U18 | NBS-LRR disease resistance protein | Deep root ratio             | 11 | RM287 | 16767319 | RM229   | 18408009 | Yue et al (2006)        |
| LOC_Os11g45180 | U18 | NBS-LRR disease resistance protein | Maximum root length         | 11 | RM287 | 16767319 | RM229   | 18408009 | Yue et al (2006)        |
| LOC_Os11g45180 | U18 | NBS-LRR disease resistance protein | Root growth rate in depth   | 11 | RM287 | 16767319 | RM229   | 18408009 | Yue et al (2006)        |
| LOC_Os11g45180 | U18 | NBS-LRR disease resistance protein | Root growth rate in depth   | 11 | RM287 | 16767319 | RM229   | 18408009 | Yue et al (2006)        |
| LOC_Os11g45180 | U18 | NBS-LRR disease resistance protein | Deep root weight            | 11 | G257  | 17353847 | ME2_6   | 19173094 | Kamoshita et al (2002a) |
| LOC_Os11g45180 | U18 | NBS-LRR disease resistance protein | Deep root weight            | 11 | G257  | 17353847 | ME2_6   | 19173094 | Kamoshita et al (2002a) |
| LOC_Os11g45180 | U18 | NBS-LRR disease resistance protein | Deep root ratio             | 11 | G257  | 17353847 | ME2_6   | 19173094 | Kamoshita et al (2002a) |
| LOC_Os11g45180 | U18 | NBS-LRR disease resistance protein | Root pulling force          | 11 | G257  | 17353847 | RM21    | 19173094 | Zhang et al (2001a)     |
| LOC_Os11g45180 | U18 | NBS-LRR disease resistance protein | Deep root weight            | 11 | R642  | 2015713  | RZ141   | 4078514  | MacMillan et al (2006)  |
| LOC_Os11g45180 | U18 | NBS-LRR disease resistance protein | Maximum root length         | 11 | R642  | 2015713  | RZ141   | 4078514  | Price et al (1999)      |
| LOC_Os11g45180 | U18 | NBS-LRR disease resistance protein | Deep root ratio             | 11 | ME6_7 | 19563844 | ME7_2   | 22014851 | Kamoshita et al (2002a) |
| LOC_Os11g45180 | U18 | NBS-LRR disease resistance protein | Deep root weight per tiller | 11 | ME7_2 | 19563844 | EM18_19 | 22014851 | Kamoshita et al (2002a) |
| LOC_Os11g45180 | U18 | NBS-LRR disease resistance protein | Root thickness              | 11 | ME7_2 | 19563844 | EM18_19 | 22014851 | Kamoshita et al (2002a) |
| LOC_Os11g45180 | U18 | NBS-LRR disease resistance protein | Deep root ratio             | 11 | RM286 | 383711   | RM332   | 2840362  | Yue et al (2006)        |
| LOC_Os11g45180 | U18 | NBS-LRR disease resistance protein | Deep root ratio             | 11 | RM286 | 383711   | RM332   | 2840362  | Yue et al (2006)        |
| LOC_Os11g45180 | U18 | NBS-LRR disease resistance protein | Maximum root length         | 11 | RM286 | 383711   | RM332   | 2840362  | Yue et al (2006)        |
| LOC_Os11g45180 | U18 | NBS-LRR disease resistance protein | Root thickness              | 11 | RM229 | 18407879 | C189    | 21426217 | MacMillan et            |

|                |     |                                    |                            |    |       |          |       |          |                     |
|----------------|-----|------------------------------------|----------------------------|----|-------|----------|-------|----------|---------------------|
|                |     |                                    |                            |    |       |          |       |          | al (2006)           |
| LOC_Os11g45180 | U18 | NBS-LRR disease resistance protein | Root thickness             | 11 | RM229 | 18407879 | C189  | 21426217 | Price et al (2002c) |
| LOC_Os11g45180 | U18 | NBS-LRR disease resistance protein | Root growth rate in volume | 11 | RM202 | 9001608  | RM287 | 16767617 | Yue et al (2006)    |
| LOC_Os11g45180 | U18 | NBS-LRR disease resistance protein | Root growth rate in volume | 11 | RM202 | 9001608  | RM287 | 16767617 | Yue et al (2006)    |
| LOC_Os11g45180 | U18 | NBS-LRR disease resistance protein | Root growth rate in volume | 11 | RM202 | 9001608  | RM287 | 16767617 | Yue et al (2006)    |
| LOC_Os11g45180 | U18 | NBS-LRR disease resistance protein | Root growth rate in volume | 11 | RM202 | 9001608  | RM287 | 16767617 | Yue et al (2006)    |
| LOC_Os11g45180 | U18 | NBS-LRR disease resistance protein | Root dry weight            | 11 | RM202 | 9001608  | RM21  | 19173094 | Horii et al (2006)  |
| LOC_Os11g45180 | U18 | NBS-LRR disease resistance protein | Root branching index       | 11 | RM202 | 9001608  | RM21  | 19173094 | Horii et al (2006)  |
| LOC_Os11g45180 | U18 | NBS-LRR disease resistance protein | Root thickness             | 11 | OSR1  | 201993   | RM202 | 9001898  | Li et al (2005)     |

**Supplementary Table 3. Primer sequences used in the study**

| <b>Primer Name</b> | <b>Primer Sequence (5'-3')</b> |
|--------------------|--------------------------------|
| ARD4F              | AGTAATCCATCCTCCTCATC           |
| ARD4R              | CTACTATCCGGCTATCCTAC           |
| ARD4F for qRT-PCR  | AGTAATCCATCCTCCTCATC           |
| ARD4R for qRT-PCR  | GGTACTGCTTGGAGGGTAGC           |
| Hyg -F             | TACACAGCCATCGGTCCA             |
| CaMV35S-R          | ACCTCCTCGGATTCCATTGC           |
| Ubiquitin -F       | AGAAGCGCAAGAAGAAGACG           |
| Ubiquitin -R       | GCGTCGTCCACCTTGTAGA            |
